# Supplementary material
Source: publisher site journal article supplement (https://e-cmh.org/upload/media/cmh-2024-0038-Supplementary-Fig-3.pdf)
Supplement: Supplementary file 1 [file cmh-2024-0038-Supplementary-Fig-3.pdf]

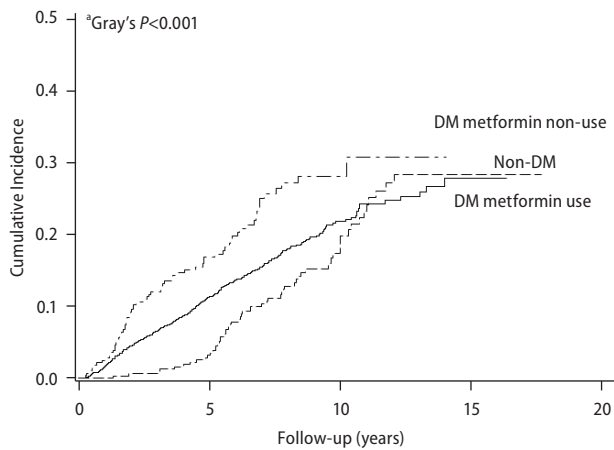

**A** The effects of DM with and without metformin for HCC risk after excluding 78 IFN failed patients who experienced retreatment with DAAs

| Groups            |                          | BL    | 1Y    | 3Y    | 5Y    | 8Y   | 10Y  | <sup>b</sup> Crude SHR<br>(95% CI)<br>P-value | <sup>b*</sup> Adjusted SHR<br>(95% CI)<br>P-value |
|-------------------|--------------------------|-------|-------|-------|-------|------|------|-----------------------------------------------|---------------------------------------------------|
| DM                | No. at risk              | 284   | 272   | 229   | 170   | 72   | 20   |                                               |                                                   |
| metformin non-use | Cumulative Incidence (%) |       | 2.5   | 12.0  | 16.7  | 27.1 | 28.0 | 1.53 (1.17-2.00)<br>P=0.002                   | 1.50 (1.13-1.98)<br>P=0.005                       |
| DM                | No. at risk              | 326   | 326   | 320   | 292   | 189  | 93   |                                               |                                                   |
| metformin use     | Cumulative Incidence (%) |       | 0     | 0.6   | 3.2   | 12.8 | 19.7 | 0.82 (0.63-1.07)<br>P=0.134                   | 0.95 (0.73-1.25)<br>P=0.729                       |
| Non-DM            | No. at risk              | 2,091 | 2,029 | 1,853 | 1,420 | 683  | 261  |                                               |                                                   |
|                   | Cumulative Incidence (%) |       | 1.6   | 6.6   | 11.3  | 17.9 | 21.7 | 1                                             | 1                                                 |

**Supplementary Figure 3.** The impact of DM with and without metformin (A) and HLP with and without statin (B) on the new-onset HCC among CHC patients who failed IFN therapy and did not subsequently receive DAAs treatment (n=2,701). (A) <sup>a</sup>After considering death as a competing risk, a Kaplan–Meier plot was constructed using Gray’s cumulative incidence method. <sup>b</sup>All SHRs (95% CIs) and P-values were calculated using the Cox sub-distribution hazards method. \*Adjusted for age, sex, LC, HCV GT1, HCV RNA, aspirin, and HLP/statin. DM, diabetes mellitus; HLP, hyperlipidemia; HCC, hepatocellular carcinoma; SHR, sub-distribution hazard ratio; LC, liver cirrhosis; GT, genotype. (B) <sup>a</sup>After considering death as a competing risk, a Kaplan–Meier plot was constructed using Gray’s cumulative incidence method. <sup>b</sup>All SHRs (95% CIs) and P-values were calculated using the Cox sub-distribution hazards method. \*Adjusted for age, sex, LC, HCV GT1, HCV RNA, aspirin, and DM/metformin. DM, diabetes mellitus; HLP, hyperlipidemia; HCC, hepatocellular carcinoma; SHR, sub-distribution hazard ratio; LC, liver cirrhosis; GT, genotype.

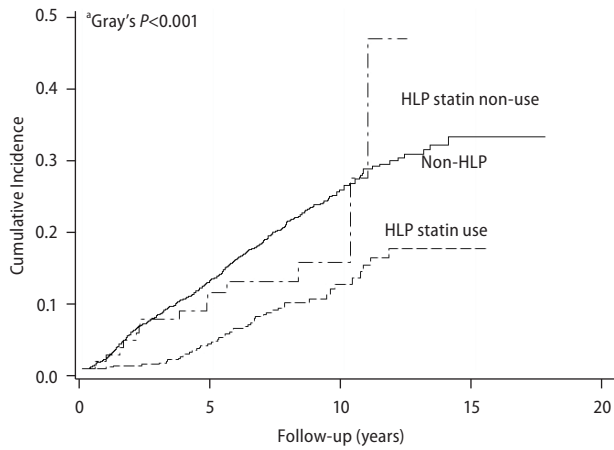

**B** The effects of HLP with and without statin for HCC risk after excluding 78 IFN failed patients who experienced retreatment with DAAs

| Groups                |                          | BL    | 1Y    | 3Y    | 5Y    | 8Y   | 10Y  | <sup>b</sup> Crude SHR<br>(95% CI)<br><i>P</i> -value | <sup>b*</sup> Adjusted SHR<br>(95% CI)<br><i>P</i> -value |
|-----------------------|--------------------------|-------|-------|-------|-------|------|------|-------------------------------------------------------|-----------------------------------------------------------|
| HLP<br>statin non-use | No. at risk              | 101   | 98    | 90    | 59    | 32.0 | 7    | 0.75 (0.44-1.28)<br><i>P</i> =0.296                   | 0.70 (0.41-1.18)<br><i>P</i> =0.181                       |
|                       | Cumulative Incidence (%) |       | 2.0   | 6.9   | 10.6  | 12.1 | 14.8 |                                                       |                                                           |
| HLP<br>statin use     | No. at risk              | 485   | 485   | 474   | 417   | 236  | 108  | 0.41 (0.31-0.55)<br><i>P</i> <0.001                   | 0.45 (0.33-0.60)<br><i>P</i> <0.001                       |
|                       | Cumulative Incidence (%) |       | 0.2   | 0.8   | 3.7   | 9.2  | 11.7 |                                                       |                                                           |
| Non-HLP               | No. at risk              | 2,115 | 2,044 | 1,838 | 1,406 | 676  | 257  | 1                                                     | 1                                                         |
|                       | Cumulative Incidence (%) |       | 1.8   | 7.7   | 12.5  | 20.7 | 25.5 |                                                       |                                                           |

Supplementary Figure 3. Continued
